# Supplementary material for: Correlation Between Surrogate End Points and Overall Survival in a Multi-institutional Clinicogenomic Cohort of Patients With Non–Small Cell Lung or Colorectal Cancer
Source: PubMed Central journal article supplement (PMC8314138; doi:10.1001/jamanetworkopen.2021.17547), 2021-07-26

## Supplementary Online Content

Kehl KL, Riely GJ, Lepisto EM, et al; American Association of Cancer Research (AACR) Project Genomics Evidence Neoplasia Information Exchange (GENIE) Consortium. Association between surrogate end points and overall survival in a multi-institutional clinicogenomic cohort of patients with non–small cell lung or colorectal cancer. *JAMA Netw Open*. 2021;4(7):e2117547.  
doi:10.1001/jamanetworkopen.2021.17547

**eTable 1.** Correlations Between Surrogate Outcomes and Overall Survival by Therapy Regimen Category: Sensitivity Analysis Restricted to Patients Who Started First-Line Therapy After Genomic Testing

**eTable 2.** Most Common Systemic Therapy Regimens Administered as First-Line Therapy

**eTable 3.** Correlations Between Surrogate Outcomes and Overall Survival by Therapy Regimen Category: Sensitivity Analysis Excluding Patients Who Died Without Experiencing a Surrogate Outcome Event

**eFigure 1.** Cohort Derivation: Non–Small Cell Lung Cancer (NSCLC)

**eFigure 2.** Cohort Derivation: Colorectal Cancer (CRC)

This supplementary material has been provided by the authors to give readers additional information about their work.

**eTable 1.** Correlations Between Surrogate Outcomes and Overall Survival by Therapy Regimen Category: Sensitivity Analysis Restricted to Patients Who Started First-Line Therapy After Genomic Testing

|                                    | Index date: Start of first-line therapy |                                    |                                    |
|------------------------------------|-----------------------------------------|------------------------------------|------------------------------------|
|                                    | N                                       | Median time to event, months (IQR) | Rho (correlation with OS) (95% CI) |
| NSCLC: All regimens                |                                         |                                    |                                    |
| OS                                 | 375                                     | 22.8 (9.5-55.4)                    | 1.0                                |
| TTD                                |                                         | 3.3 (1.4-8.7)                      | 0.53 (0.44-0.61)                   |
| TTNT                               |                                         | 6.7 (2.3-17.5)                     | 0.66 (0.57-0.73)                   |
| PFS-I                              |                                         | 5.6 (1.9-15.1)                     | 0.68 (0.60-0.74)                   |
| PFS-M                              |                                         | 6.9 (2.9-21.0)                     | 0.69 (0.62-0.75)                   |
| PFS-I-or-M                         |                                         | 4.9 (1.4-12.3)                     | 0.62 (0.54-0.69)                   |
| PFS-I-and-M                        |                                         | 8.1 (3.7-22.9)                     | 0.79 (0.73-0.84)                   |
| CRC: All regimens                  |                                         |                                    |                                    |
| OS                                 | 160                                     | NR (18.2-NR)                       | 1.0                                |
| TTD                                |                                         | 4.4 (2.0-6.6)                      | 0.29 (0.08-0.47)                   |
| TTNT                               |                                         | 11.4 (3.7-NR)                      | 0.64 (0.44-0.78)                   |
| PFS-I                              |                                         | 10.0 (3.7-47.6)                    | 0.77 (0.64-0.86)                   |
| PFS-M                              |                                         | 13.9 (7.2-49.1)                    | 0.79 (0.66-0.87)                   |
| PFS-I-or-M                         |                                         | 10.0 (3.2-31.1)                    | 0.75 (0.61-0.85)                   |
| PFS-I-and-M                        |                                         | 14.3 (7.5-49.1)                    | 0.82 (0.71-0.90)                   |
| NSCLC: Cytotoxic chemotherapy only |                                         |                                    |                                    |
| OS                                 | 170                                     | 20.3 (6.6-53.2)                    | 1.0                                |
| TTD                                |                                         | 2.8 (1.7-4.2)                      | 0.40 (0.25-0.53)                   |
| TTNT                               |                                         | 4.9 (2.0-13.0)                     | 0.57 (0.40-0.70)                   |
| PFS-I                              |                                         | 5.6 (2.5-14.7)                     | 0.73 (0.63-0.80)                   |
| PFS-M                              |                                         | 6.0 (3.0-16.8)                     | 0.69 (0.59-0.77)                   |
| PFS-I-or-M                         |                                         | 4.5 (1.9-11.1)                     | 0.66 (0.56-0.75)                   |
| PFS-I-and-M                        |                                         | 6.6 (3.7-18.4)                     | 0.77 (0.68-0.84)                   |
| NSCLC: Immunotherapy only          |                                         |                                    |                                    |
| OS                                 | 66                                      | 20.8 (7.2-43.9)                    | 1.0                                |
| TTD                                |                                         | 4.0 (2.1-10.9)                     | 0.72 (0.52-0.84)                   |

|                              |    |                 |                  |
|------------------------------|----|-----------------|------------------|
| TTNT                         |    | 6.3 (2.5-25.1)  | 0.71 (0.51-0.84) |
| PFS-I                        |    | 3.2 (1.4-13.8)  | 0.66 (0.44-0.80) |
| PFS-M                        |    | 4.2 (1.4-13.8)  | 0.65 (0.44-0.79) |
| PFS-I-or-M                   |    | 1.9 (1.2-11.5)  | 0.58 (0.31-0.76) |
| PFS-I-and-M                  |    | 5.3 (1.7-15.8)  | 0.76 (0.57-0.87) |
|                              |    |                 |                  |
| NSCLC: Oral targeted therapy |    |                 |                  |
| OS                           |    | 37.2 (18.5-NR)  | 1.0              |
| TTD                          |    | 10.8 (6.3-38.7) | 0.67 (0.44-0.81) |
| TTNT                         |    | 11.9 (7.0-28.2) | 0.70 (0.52-0.82) |
| PFS-I                        | 73 | 8.1 (5.0-22.9)  | 0.59 (0.34-0.77) |
| PFS-M                        |    | 16.8 (6.8-36.7) | 0.74 (0.42-0.90) |
| PFS-I-or-M                   |    | 7.8 (4.9-22.9)  | 0.57 (0.30-0.76) |
| PFS-I-and-M                  |    | 16.8 (7.4-36.7) | 0.83 (0.69-0.91) |

Legend to Supplemental Table 1: NSCLC, non-small cell lung cancer; CRC, colorectal cancer; OS, overall survival; TTD, time to treatment discontinuation (or death); TTNT, time to next treatment, or death; PFS-I, time to progression annotated on an imaging report, or death; PFS-M, time to progression annotated on a medical oncologist note, or death; PFS-I-or-M, time to progression annotated on either an imaging report or medical oncologist note, or death; PFS-I-and-M, time to progression having been annotated on both an imaging report and a medical oncologist note, or death; NR, not reached.

**eTable 2.** Most Common Systemic Therapy Regimens Administered as First-Line Therapy

| Non-small cell lung cancer (N=1161)      |     | Colorectal cancer (N=1150)               |     |
|------------------------------------------|-----|------------------------------------------|-----|
| Regimen                                  | N   | Regimen                                  | N   |
| Carboplatin + pemetrexed                 | 210 | FOLFOX                                   | 408 |
| Erlotinib                                | 116 | FOLFOX + bevacizumab                     | 228 |
| Carboplatin + paclitaxel                 | 83  | FOLFIRI + bevacizumab                    | 129 |
| Carboplatin + pemetrexed + pembrolizumab | 80  | FOLFIRI                                  | 76  |
| Cisplatin + pemetrexed                   | 72  | Capecitabine                             | 55  |
| Pembrolizumab                            | 70  | FOLFOXIRI                                | 28  |
| Single-agent clinical trial regimen      | 52  | Capecitabine + oxaliplatin               | 27  |
| Dual-agent clinical trial regimen        | 43  | Floxuridine                              | 27  |
| Nivolumab                                | 42  | 5-FU + leucovorin                        | 19  |
| Cisplatin + pemetrexed + bevacizumab     | 34  | Capecitabine + oxaliplatin + bevacizumab | 13  |
| Crizotinib                               | 31  | 5-FU                                     | 13  |
| Carboplatin + gemcitabine                | 25  | Irinotecan + bevacizumab                 | 10  |
| Cisplatin + etoposide                    | 23  |                                          |     |
| Osimertinib                              | 21  |                                          |     |
| Carboplatin + pemetrexed + pembrolizumab | 20  |                                          |     |
| Other                                    | 239 | Other                                    | 117 |

**eTable 3.** Correlations Between Surrogate Outcomes and Overall Survival by Therapy Regimen Category: Sensitivity Analysis Excluding Patients Who Died Without Experiencing a Surrogate Outcome Event

|                                           | N (%) | Median time to event, months (IQR) | Rho (correlation with OS) (95% CI) |
|-------------------------------------------|-------|------------------------------------|------------------------------------|
| <b>NSCLC: All regimens</b>                |       |                                    |                                    |
| OS                                        | 1161  | 28.9 (12.0-66.6)                   | 1.0                                |
| TTD                                       | 1145  | 3.7 (1.6-8.6)                      | 0.41 (0.36-0.47)                   |
| TTNT                                      | 1136  | 7.2 (2.9-16.6)                     | 0.59 (0.53-0.64)                   |
| PFS-I                                     | 1152  | 6.5 (2.5-15.2)                     | 0.64 (0.59-0.68)                   |
| PFS-M                                     | 1139  | 8.5 (4.1-18.4)                     | 0.70 (0.66-0.74)                   |
| PFS-I-or-M                                | 1153  | 5.7 (1.9-12.3)                     | 0.61 (0.57-0.65)                   |
| PFS-I-and-M                               | 1138  | 9.9 (4.7-21.2)                     | 0.75 (0.72-0.79)                   |
| <b>CRC: All regimens</b>                  |       |                                    |                                    |
| OS                                        | 1150  | 42.0 (22.8-83.8)                   | 1.0                                |
| TTD                                       | 1146  | 4.3 (2.3-6.5)                      | 0.12 (0.05-0.19)                   |
| TTNT                                      | 1143  | 7.2 (3.9-14.7)                     | 0.39 (0.32-0.46)                   |
| PFS-I                                     | 1147  | 10.5 (5.7-19.1)                    | 0.66 (0.61-0.70)                   |
| PFS-M                                     | 1142  | 13.5 (7.7-26.5)                    | 0.71 (0.66-0.75)                   |
| PFS-I-or-M                                | 1147  | 10.0 (5.1-17.4)                    | 0.65 (0.60-0.70)                   |
| PFS-I-and-M                               | 1142  | 14.4 (8.6-29.1)                    | 0.73 (0.69-0.76)                   |
| <b>NSCLC: Cytotoxic chemotherapy only</b> |       |                                    |                                    |
| OS                                        | 683   | 27.3 (11.0-66.5)                   | 1.0                                |
| TTD                                       | 678   | 3.0 (1.9-5.6)                      | 0.33 (0.26-0.40)                   |
| TTNT                                      | 669   | 6.1 (2.4-13.6)                     | 0.53 (0.46-0.59)                   |
| PFS-I                                     | 677   | 6.9 (2.8-15.4)                     | 0.66 (0.61-0.70)                   |
| PFS-M                                     | 669   | 8.4 (4.2-17.5)                     | 0.70 (0.65-0.74)                   |
| PFS-I-or-M                                | 677   | 5.9 (2.3-12.3)                     | 0.63 (0.57-0.68)                   |
| PFS-I-and-M                               | 669   | 9.3 (4.7-22.3)                     | 0.75 (0.71-0.79)                   |
| <b>NSCLC: Immunotherapy only</b>          |       |                                    |                                    |
| OS                                        | 124   | 18.6 (7.1-43.9)                    | 1.0                                |

|                              |     |                  |                  |
|------------------------------|-----|------------------|------------------|
| TTD                          | 116 | 4.4 (2.1-9.0)    | 0.69 (0.49-0.81) |
| TTNT                         | 118 | 5.2 (2.1-12.8)   | 0.68 (0.53-0.78) |
| PFS-I                        | 122 | 2.5 (1.4-10.2)   | 0.63 (0.47-0.74) |
| PFS-M                        | 121 | 4.1 (1.4-13.7)   | 0.68 (0.52-0.79) |
| PFS-I-or-M                   | 123 | 1.9 (0.9-6.2)    | 0.56 (0.41-0.68) |
| PFS-I-and-M                  | 120 | 4.5 (1.7-14.5)   | 0.77 (0.66-0.85) |
|                              |     |                  |                  |
| NSCLC: Oral targeted therapy |     |                  |                  |
| OS                           | 207 | 47.0 (22.8-91.4) | 1.0              |
| TTD                          | 207 | 12.0 (7.4-26.0)  | 0.64 (0.53-0.73) |
| TTNT                         | 205 | 12.6 (7.7-26.9)  | 0.59 (0.47-0.69) |
| PFS-I                        | 207 | 9.7 (5.1-19.6)   | 0.51 (0.35-0.65) |
| PFS-M                        | 204 | 12.7 (7.1-27.3)  | 0.62 (0.44-0.76) |
| PFS-I-or-M                   | 204 | 8.5 (4.7-19.1)   | 0.53 (0.40-0.64) |
| PFS-I-and-M                  | 207 | 14.7 (7.8-30.6)  | 0.67 (0.52-0.78) |

Legend to Supplemental Table 3: NSCLC, non-small cell lung cancer; CRC, colorectal cancer; OS, overall survival; TTD, time to treatment discontinuation (or death); TTNT, time to next treatment, or death; PFS-I, time to progression annotated on an imaging report, or death; PFS-M, time to progression annotated on a medical oncologist note, or death; PFS-I-or-M, time to progression annotated on either an imaging report or medical oncologist note, or death; PFS-I-and-M, time to progression having been annotated on both an imaging report and a medical oncologist note, or death.

**eFigure 1.** Cohort Derivation: Non–Small Cell Lung Cancer (NSCLC)

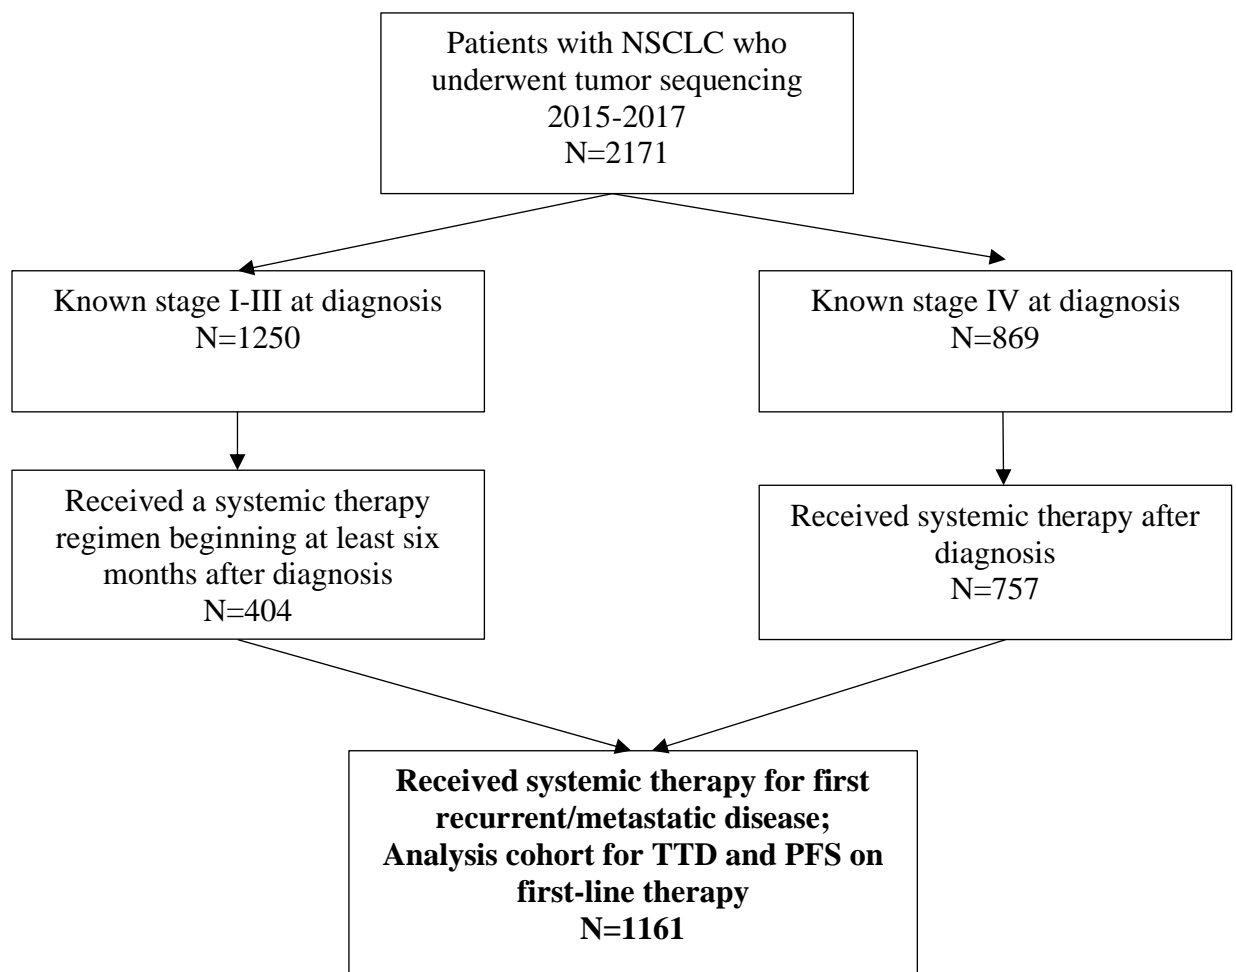

**eFigure 2.** Cohort Derivation: Colorectal Cancer (CRC)

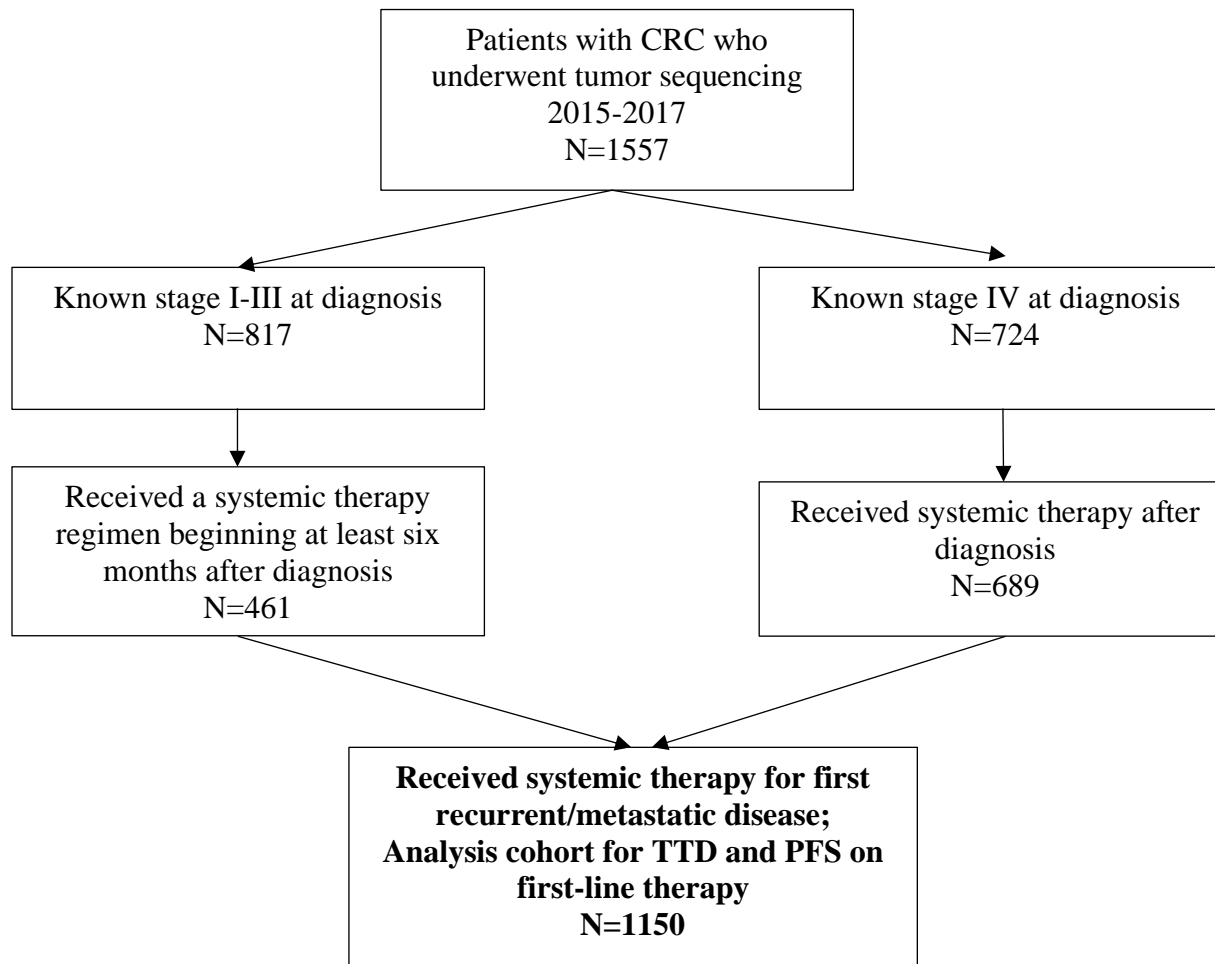

Supplement: jamanetwopen-e2117547-s001.pdf [file jamanetwopen-e2117547-s001.pdf]
