# Supplementary material for: Correlation Between Surrogate End Points and Overall Survival in a Multi-institutional Clinicogenomic Cohort of Patients With Non–Small Cell Lung or Colorectal Cancer
Source: PubMed Central journal article supplement (PMC8314138; doi:10.1001/jamanetworkopen.2021.17547), 2021-07-26
Supplement: jamanetwopen-e2117547-s002.pdf [file jamanetwopen-e2117547-s002.pdf]

Supplemental Online Content: Nonauthor Collaborators

\*Indicates required information. Only first name, last name, and suffix will appear in PubMed.

| <b>*Group Name: AACR Project GENIE Consortium</b> |                   |                              |                  |                                                   |                                          |                                                         |                                                                                            |
|---------------------------------------------------|-------------------|------------------------------|------------------|---------------------------------------------------|------------------------------------------|---------------------------------------------------------|--------------------------------------------------------------------------------------------|
| <b>*First Name and Middle Initial(s)</b>          | <b>*Last Name</b> | <b>*Suffix (eg, Jr, III)</b> | Academic Degrees | Institution                                       | Location (city, state/province, country) | Role or Contribution, eg, chair, principal investigator | Group (if more than 1 Group listed in the byline) and/or Subgroup (eg, Steering Committee) |
| Shawn                                             | Sweeney           |                              |                  | American Association for Cancer Research          | Philadelphia, PA                         |                                                         |                                                                                            |
| Margaret                                          | Foti              |                              |                  | American Association for Cancer Research          | Philadelphia, PA                         |                                                         |                                                                                            |
| Yekaterina                                        | Khotskaya         |                              |                  | American Association for Cancer Research          | Philadelphia, PA                         |                                                         |                                                                                            |
| Michael                                           | Fiandalo          |                              |                  | American Association for Cancer Research          | Philadelphia, PA                         |                                                         |                                                                                            |
| Benjamin                                          | Gross             |                              |                  | Memorial Sloan Kettering Cancer Center            | New York, NY                             |                                                         |                                                                                            |
| Nikolaus                                          | Schultz           |                              |                  | Memorial Sloan Kettering Cancer Center            | New York, NY                             |                                                         |                                                                                            |
| Brooke                                            | Mastrogiacom      |                              |                  | Memorial Sloan Kettering Cancer Center            | New York, NY                             |                                                         |                                                                                            |
| Mahdi                                             | Sarmardy          |                              |                  | Children's Hospital of Philadelphia Cancer Center | Philadelphia, PA                         |                                                         |                                                                                            |
| Marilyn                                           | Li                |                              |                  | Children's Hospital of Philadelphia Cancer Center | Philadelphia, PA                         |                                                         |                                                                                            |
| Adam                                              | Resnick           |                              |                  | Children's Hospital of Philadelphia Cancer Center | Philadelphia, PA                         |                                                         |                                                                                            |
| Angela                                            | Waanders          |                              |                  | Children's Hospital of Philadelphia Cancer Center | Philadelphia, PA                         |                                                         |                                                                                            |
| Jena                                              | Lilly             |                              |                  | Children's Hospital of Philadelphia Cancer Center | Philadelphia, PA                         |                                                         |                                                                                            |
| Richard                                           | Carvajal          |                              |                  | COLUMBIA                                          | New York, NY                             |                                                         |                                                                                            |
| Raul                                              | Rabadan           |                              |                  | COLUMBIA                                          | New York, NY                             |                                                         |                                                                                            |
| Matthew                                           | Ingham            |                              |                  | COLUMBIA                                          | New York, NY                             |                                                         |                                                                                            |
| Susan                                             | Hsaio             |                              |                  | COLUMBIA                                          | New York, NY                             |                                                         |                                                                                            |

## Supplemental Online Content: Nonauthor Collaborators

\*Indicates required information. Only first name, last name, and suffix will appear in PubMed.

| *First Name and Middle Initial(s) | *Last Name  | *Suffix (eg, Jr, III) | Academic Degrees | Institution                         | Location (city, state/province, country) | Role or Contribution, eg, chair, principal investigator | Group (if more than 1 Group listed in the byline) and/or Subgroup (eg, Steering Committee) |
|-----------------------------------|-------------|-----------------------|------------------|-------------------------------------|------------------------------------------|---------------------------------------------------------|--------------------------------------------------------------------------------------------|
| Jean                              | Abraham     |                       |                  | Cancer Research UK Cambridge Centre | Cambridge, UK                            |                                                         |                                                                                            |
| James                             | Brenton     |                       |                  | Cancer Research UK Cambridge Centre | Cambridge, UK                            |                                                         |                                                                                            |
| Oscar                             | Rueda       |                       |                  | Cancer Research UK Cambridge Centre | Cambridge, UK                            |                                                         |                                                                                            |
| Carlos                            | Caldas      |                       |                  | Cancer Research UK Cambridge Centre | Cambridge, UK                            |                                                         |                                                                                            |
| Mikel                             | Valgañón    |                       |                  | Cancer Research UK Cambridge Centre | Cambridge, UK                            |                                                         |                                                                                            |
| Dilrini                           | Silva       |                       |                  | Cancer Research UK Cambridge Centre | Cambridge, UK                            |                                                         |                                                                                            |
| Chris                             | Boursnell   |                       |                  | Cancer Research UK Cambridge Centre | Cambridge, UK                            |                                                         |                                                                                            |
| Raquel                            | Garcia      |                       |                  | Cancer Research UK Cambridge Centre | Cambridge, UK                            |                                                         |                                                                                            |
| Ezequiel                          | Rodriguez   |                       |                  | Cancer Research UK Cambridge Centre | Cambridge, UK                            |                                                         |                                                                                            |
| Birgit                            | Nimmervoll  |                       |                  | Cancer Research UK Cambridge Centre | Cambridge, UK                            |                                                         |                                                                                            |
| Ethan                             | Cerami      |                       |                  | Dana-Farber Cancer Institute        | Boston, MA                               |                                                         |                                                                                            |
| Matthew                           | Ducar       |                       |                  | Dana-Farber Cancer Institute        | Boston, MA                               |                                                         |                                                                                            |
| Priti                             | Kumari      |                       |                  | Dana-Farber Cancer Institute        | Boston, MA                               |                                                         |                                                                                            |
| Neal                              | Lindeman    |                       |                  | Dana-Farber Cancer Institute        | Boston, MA                               |                                                         |                                                                                            |
| Laura                             | MacConnaill |                       |                  | Dana-Farber Cancer Institute        | Boston, MA                               |                                                         |                                                                                            |
| John                              | Orechia     |                       |                  | Dana-Farber Cancer Institute        | Boston, MA                               |                                                         |                                                                                            |
| Deborah                           | Schrag      |                       |                  | Dana-Farber Cancer Institute        | Boston, MA                               |                                                         |                                                                                            |
| Priyanka                          | Shivdasani  |                       |                  | Dana-Farber Cancer Institute        | Boston, MA                               |                                                         |                                                                                            |
| Eliezer                           | Van Allen   |                       |                  | Dana-Farber Cancer Institute        | Boston, MA                               |                                                         |                                                                                            |
| Jason                             | Johnson     |                       |                  | Dana-Farber Cancer Institute        | Boston, MA                               |                                                         |                                                                                            |

## Supplemental Online Content: Nonauthor Collaborators

\*Indicates required information. Only first name, last name, and suffix will appear in PubMed.

| *First Name and Middle Initial(s) | *Last Name    | *Suffix (eg, Jr, III) | Academic Degrees | Institution                      | Location (city, state/province, country) | Role or Contribution, eg, chair, principal investigator | Group (if more than 1 Group listed in the byline) and/or Subgroup (eg, Steering Committee) |
|-----------------------------------|---------------|-----------------------|------------------|----------------------------------|------------------------------------------|---------------------------------------------------------|--------------------------------------------------------------------------------------------|
| Pasi                              | Jänne         |                       |                  | Dana-Farber Cancer Institute     | Boston, MA                               |                                                         |                                                                                            |
| Eva                               | Lepisto       |                       |                  | Dana-Farber Cancer Institute     | Boston, MA                               |                                                         |                                                                                            |
| Michael                           | Hassett       |                       |                  | Dana-Farber Cancer Institute     | Boston, MA                               |                                                         |                                                                                            |
| Sindy                             | Pimentel      |                       |                  | Dana-Farber Cancer Institute     | Boston, MA                               |                                                         |                                                                                            |
| Parin                             | Sripakdeevong |                       |                  | Dana-Farber Cancer Institute     | Boston, MA                               |                                                         |                                                                                            |
| Katherine                         | Janeway       |                       |                  | Dana-Farber Cancer Institute     | Boston, MA                               |                                                         |                                                                                            |
| Jason M.                          | Johnson       |                       |                  | Dana-Farber Cancer Institute     | Boston, MA                               |                                                         |                                                                                            |
| Matthew                           | Meyerson      |                       |                  | Dana-Farber Cancer Institute     | Boston, MA                               |                                                         |                                                                                            |
| Daniel                            | Quinn         |                       |                  | Dana-Farber Cancer Institute     | Boston, MA                               |                                                         |                                                                                            |
| Oya                               | Cushing       |                       |                  | Dana-Farber Cancer Institute     | Boston, MA                               |                                                         |                                                                                            |
| Kevin                             | Haigis        |                       |                  | Dana-Farber Cancer Institute     | Boston, MA                               |                                                         |                                                                                            |
| Diana                             | Miller        |                       |                  | Dana-Farber Cancer Institute     | Boston, MA                               |                                                         |                                                                                            |
| Kenneth                           | Kehl          |                       |                  | Dana-Farber Cancer Institute     | Boston, MA                               |                                                         |                                                                                            |
| Alexander                         | Gustav        |                       |                  | Dana-Farber Cancer Institute     | Boston, MA                               |                                                         |                                                                                            |
| Angela                            | Tramontano    |                       |                  | Dana-Farber Cancer Institute     | Boston, MA                               |                                                         |                                                                                            |
| Simon Arango                      | Baquero       |                       |                  | Dana-Farber Cancer Institute     | Boston, MA                               |                                                         |                                                                                            |
| Jonathan                          | Bell          |                       |                  | Duke University Cancer Institute | Durham, NC                               |                                                         |                                                                                            |
| Michelle                          | Green         |                       |                  | Duke University Cancer Institute | Durham, NC                               |                                                         |                                                                                            |
| Shannon                           | McCall        |                       |                  | Duke University Cancer Institute | Durham, NC                               |                                                         |                                                                                            |
| Michael                           | Datto         |                       |                  | Duke University Cancer Institute | Durham, NC                               |                                                         |                                                                                            |
| Fabien                            | Calvo         |                       |                  | Gustave Roussy Cancer Campus     | Villejuif, France                        |                                                         |                                                                                            |
| Fabrice                           | Andre         |                       |                  | Gustave Roussy Cancer Campus     | Villejuif, France                        |                                                         |                                                                                            |
| Meurice                           | Guillaume     |                       |                  | Gustave Roussy Cancer Campus     | Villejuif, France                        |                                                         |                                                                                            |

## Supplemental Online Content: Nonauthor Collaborators

\*Indicates required information. Only first name, last name, and suffix will appear in PubMed.

| <b>*First Name and Middle Initial(s)</b> | <b>*Last Name</b> | <b>*Suffix (eg, Jr, III)</b> | Academic Degrees | Institution                                                           | Location (city, state/province, country) | Role or Contribution, eg, chair, principal investigator | Group (if more than 1 Group listed in the byline) and/or Subgroup (eg, Steering Committee) |
|------------------------------------------|-------------------|------------------------------|------------------|-----------------------------------------------------------------------|------------------------------------------|---------------------------------------------------------|--------------------------------------------------------------------------------------------|
| Semih                                    | Dogan             |                              |                  | Gustave Roussy Cancer Campus                                          | Villejuif, France                        |                                                         |                                                                                            |
| Lacroix                                  | Ludovic           |                              |                  | Gustave Roussy Cancer Campus                                          | Villejuif, France                        |                                                         |                                                                                            |
| Jean                                     | Scoazec           |                              |                  | Gustave Roussy Cancer Campus                                          | Villejuif, France                        |                                                         |                                                                                            |
| Monica                                   | Ardenos           |                              |                  | Gustave Roussy Cancer Campus                                          | Villejuif, France                        |                                                         |                                                                                            |
| Gilles                                   | Vassal            |                              |                  | Gustave Roussy Cancer Campus                                          | Villejuif, France                        |                                                         |                                                                                            |
| Stefan                                   | Michels           |                              |                  | Gustave Roussy Cancer Campus                                          | Villejuif, France                        |                                                         |                                                                                            |
| Victor                                   | Velculescu        |                              |                  | Sidney Kimmel Comprehensive Cancer Center at Johns Hopkins University | Baltimore, MD                            |                                                         |                                                                                            |
| Alexander                                | Baras             |                              |                  | Sidney Kimmel Comprehensive Cancer Center at Johns Hopkins University | Baltimore, MD                            |                                                         |                                                                                            |
| Christopher                              | Gocke             |                              |                  | Sidney Kimmel Comprehensive Cancer Center at Johns Hopkins University | Baltimore, MD                            |                                                         |                                                                                            |
| Julie                                    | Brahmer           |                              |                  | Sidney Kimmel Comprehensive Cancer Center at Johns Hopkins University | Baltimore, MD                            |                                                         |                                                                                            |
| Charles                                  | Sawyers           |                              |                  | Memorial Sloan Kettering Cancer Center                                | New York, NY                             |                                                         |                                                                                            |
| David                                    | Solit             |                              |                  | Memorial Sloan Kettering Cancer Center                                | New York, NY                             |                                                         |                                                                                            |
| Stu                                      | Gardos            |                              |                  | Memorial Sloan Kettering Cancer Center                                | New York, NY                             |                                                         |                                                                                            |

Supplemental Online Content: Nonauthor Collaborators

\*Indicates required information. Only first name, last name, and suffix will appear in PubMed.

| <b>*First Name and Middle Initial(s)</b> | <b>*Last Name</b> | <b>*Suffix (eg, Jr, III)</b> | Academic Degrees | Institution                            | Location (city, state/province, country) | Role or Contribution, eg, chair, principal investigator | Group (if more than 1 Group listed in the byline) and/or Subgroup (eg, Steering Committee) |
|------------------------------------------|-------------------|------------------------------|------------------|----------------------------------------|------------------------------------------|---------------------------------------------------------|--------------------------------------------------------------------------------------------|
| Mike                                     | Berger            |                              |                  | Memorial Sloan Kettering Cancer Center | New York, NY                             |                                                         |                                                                                            |
| Marc                                     | Ladanyi           |                              |                  | Memorial Sloan Kettering Cancer Center | New York, NY                             |                                                         |                                                                                            |
| Gregory                                  | Riely             |                              |                  | Memorial Sloan Kettering Cancer Center | New York, NY                             |                                                         |                                                                                            |
| Joseph                                   | Sirintrapun       |                              |                  | Memorial Sloan Kettering Cancer Center | New York, NY                             |                                                         |                                                                                            |
| Ari                                      | Caroline          |                              |                  | Memorial Sloan Kettering Cancer Center | New York, NY                             |                                                         |                                                                                            |
| Joseph                                   | Sirintrapun       |                              |                  | Memorial Sloan Kettering Cancer Center | New York, NY                             |                                                         |                                                                                            |
| Stacy                                    | Thomas            |                              |                  | Memorial Sloan Kettering Cancer Center | New York, NY                             |                                                         |                                                                                            |
| Andrew                                   | Zarski            |                              |                  | Memorial Sloan Kettering Cancer Center | New York, NY                             |                                                         |                                                                                            |
| Ahmet                                    | Zehir             |                              |                  | Memorial Sloan Kettering Cancer Center | New York, NY                             |                                                         |                                                                                            |
| Alexia                                   | Iasonosa          |                              |                  | Memorial Sloan Kettering Cancer Center | New York, NY                             |                                                         |                                                                                            |
| John                                     | Philip            |                              |                  | Memorial Sloan Kettering Cancer Center | New York, NY                             |                                                         |                                                                                            |
| Samantha                                 | Brown             |                              |                  | Memorial Sloan Kettering Cancer Center | New York, NY                             |                                                         |                                                                                            |
| Andrew                                   | Kung              |                              |                  | Memorial Sloan Kettering Cancer Center | New York, NY                             |                                                         |                                                                                            |
| Ritika                                   | Kundra            |                              |                  | Memorial Sloan Kettering Cancer Center | New York, NY                             |                                                         |                                                                                            |
| Julia                                    | Rudolph           |                              |                  | Memorial Sloan Kettering Cancer Center | New York, NY                             |                                                         |                                                                                            |

Supplemental Online Content: Nonauthor Collaborators

\*Indicates required information. Only first name, last name, and suffix will appear in PubMed.

| <b>*First Name and Middle Initial(s)</b> | <b>*Last Name</b> | <b>*Suffix (eg, Jr, III)</b> | Academic Degrees | Institution                                                                                            | Location (city, state/province, country) | Role or Contribution, eg, chair, principal investigator | Group (if more than 1 Group listed in the byline) and/or Subgroup (eg, Steering Committee) |
|------------------------------------------|-------------------|------------------------------|------------------|--------------------------------------------------------------------------------------------------------|------------------------------------------|---------------------------------------------------------|--------------------------------------------------------------------------------------------|
| Jessica                                  | Lavery            |                              |                  | Memorial Sloan Kettering Cancer Center                                                                 | New York, NY                             |                                                         |                                                                                            |
| Hira                                     | Rivzi             |                              |                  | Memorial Sloan Kettering Cancer Center                                                                 | New York, NY                             |                                                         |                                                                                            |
| Julian                                   | Schwartz          |                              |                  | Memorial Sloan Kettering Cancer Center                                                                 | New York, NY                             |                                                         |                                                                                            |
| Caroline                                 | McCarthy          |                              |                  | Memorial Sloan Kettering Cancer Center                                                                 | New York, NY                             |                                                         |                                                                                            |
| Maufur                                   | Bhuiya            |                              |                  | Memorial Sloan Kettering Cancer Center                                                                 | New York, NY                             |                                                         |                                                                                            |
| Axel                                     | Martin            |                              |                  | Memorial Sloan Kettering Cancer Center                                                                 | New York, NY                             |                                                         |                                                                                            |
| Cynthia                                  | Chu               |                              |                  | Memorial Sloan Kettering Cancer Center                                                                 | New York, NY                             |                                                         |                                                                                            |
| Raymond                                  | DuBois            |                              |                  | Medical University of South Carolina                                                                   | Charleston, SC                           |                                                         |                                                                                            |
| Tony                                     | van de Velde      |                              |                  | The Netherlands Cancer Institute, Amsterdam, on behalf of the Center for Personalized Cancer Treatment | Utrecht, The Netherlands                 |                                                         |                                                                                            |
| Geritt                                   | Meijer            |                              |                  | The Netherlands Cancer Institute, Amsterdam, on behalf of the Center for Personalized Cancer Treatment | Utrecht, The Netherlands                 |                                                         |                                                                                            |
| Hugo                                     | Horlings          |                              |                  | The Netherlands Cancer Institute, Amsterdam, on behalf of the Center for Personalized Cancer Treatment | Utrecht, The Netherlands                 |                                                         |                                                                                            |

Supplemental Online Content: Nonauthor Collaborators

\*Indicates required information. Only first name, last name, and suffix will appear in PubMed.

| <b>*First Name and Middle Initial(s)</b> | <b>*Last Name</b> | <b>*Suffix (eg, Jr, III)</b> | Academic Degrees | Institution                                                                                            | Location (city, state/province, country) | Role or Contribution, eg, chair, principal investigator | Group (if more than 1 Group listed in the byline) and/or Subgroup (eg, Steering Committee) |
|------------------------------------------|-------------------|------------------------------|------------------|--------------------------------------------------------------------------------------------------------|------------------------------------------|---------------------------------------------------------|--------------------------------------------------------------------------------------------|
| Harm                                     | van Tinteren      |                              |                  | The Netherlands Cancer Institute, Amsterdam, on behalf of the Center for Personalized Cancer Treatment | Utrecht, The Netherlands                 |                                                         |                                                                                            |
| Martijn                                  | Lolkema           |                              |                  | The Netherlands Cancer Institute, Amsterdam, on behalf of the Center for Personalized Cancer Treatment | Utrecht, The Netherlands                 |                                                         |                                                                                            |
| Les                                      | Nijman            |                              |                  | The Netherlands Cancer Institute, Amsterdam, on behalf of the Center for Personalized Cancer Treatment | Utrecht, The Netherlands                 |                                                         |                                                                                            |
| Mariska                                  | Bierkens          |                              |                  | The Netherlands Cancer Institute, Amsterdam, on behalf of the Center for Personalized Cancer Treatment | Utrecht, The Netherlands                 |                                                         |                                                                                            |
| Jelle                                    | Hoeve             |                              |                  | The Netherlands Cancer Institute, Amsterdam, on behalf of the Center for Personalized Cancer Treatment | Utrecht, The Netherlands                 |                                                         |                                                                                            |
| Emilie                                   | Voest             |                              |                  | The Netherlands Cancer Institute, Amsterdam, on behalf of the Center for Personalized Cancer Treatment | Utrecht, The Netherlands                 |                                                         |                                                                                            |
| Annemieke                                | Hiemstra          |                              |                  | The Netherlands Cancer Institute, Amsterdam, on behalf of the Center for Personalized Cancer Treatment | Utrecht, The Netherlands                 |                                                         |                                                                                            |

Supplemental Online Content: Nonauthor Collaborators

\*Indicates required information. Only first name, last name, and suffix will appear in PubMed.

| <b>*First Name and Middle Initial(s)</b> | <b>*Last Name</b> | <b>*Suffix (eg, Jr, III)</b> | Academic Degrees | Institution                                                                                            | Location (city, state/province, country) | Role or Contribution, eg, chair, principal investigator | Group (if more than 1 Group listed in the byline) and/or Subgroup (eg, Steering Committee) |
|------------------------------------------|-------------------|------------------------------|------------------|--------------------------------------------------------------------------------------------------------|------------------------------------------|---------------------------------------------------------|--------------------------------------------------------------------------------------------|
| Gabe                                     | Sonke             |                              |                  | The Netherlands Cancer Institute, Amsterdam, on behalf of the Center for Personalized Cancer Treatment | Utrecht, The Netherlands                 |                                                         |                                                                                            |
| Jacques                                  | Craenmehr         |                              |                  | The Netherlands Cancer Institute, Amsterdam, on behalf of the Center for Personalized Cancer Treatment | Utrecht, The Netherlands                 |                                                         |                                                                                            |
| Jan                                      | Hudecek           |                              |                  | The Netherlands Cancer Institute, Amsterdam, on behalf of the Center for Personalized Cancer Treatment | Utrecht, The Netherlands                 |                                                         |                                                                                            |
| Kim                                      | Monkhorst         |                              |                  | The Netherlands Cancer Institute, Amsterdam, on behalf of the Center for Personalized Cancer Treatment | Utrecht, The Netherlands                 |                                                         |                                                                                            |
| Walter                                   | Urba              |                              |                  | Providence Cancer Institute                                                                            | Portland, Oregon                         |                                                         |                                                                                            |
| Brady                                    | Bernard           |                              |                  | Providence Cancer Institute                                                                            | Portland, Oregon                         |                                                         |                                                                                            |
| Brian                                    | Piening           |                              |                  | Providence Cancer Institute                                                                            | Portland, Oregon                         |                                                         |                                                                                            |
| Carlo                                    | Bifulco           |                              |                  | Providence Cancer Institute                                                                            | Portland, Oregon                         |                                                         |                                                                                            |
| Paul                                     | Tittel            |                              |                  | Providence Cancer Institute                                                                            | Portland, Oregon                         |                                                         |                                                                                            |
| Julie                                    | Cramer            |                              |                  | Providence Cancer Institute                                                                            | Portland, Oregon                         |                                                         |                                                                                            |
| Justin                                   | Guinney           |                              |                  | SAGE Bionetworks                                                                                       | Seattle, WA                              |                                                         |                                                                                            |
| Thomas                                   | Yu                |                              |                  | SAGE Bionetworks                                                                                       | Seattle, WA                              |                                                         |                                                                                            |
| Xindi                                    | Guo               |                              |                  | SAGE Bionetworks                                                                                       | Seattle, WA                              |                                                         |                                                                                            |
| Alyssa                                   | Acebedo           |                              |                  | SAGE Bionetworks                                                                                       | Seattle, WA                              |                                                         |                                                                                            |
| Philip                                   | Gold              |                              |                  | Swedish Cancer Institute                                                                               | Seattle, WA                              |                                                         |                                                                                            |
| Neil                                     | Bailey            |                              |                  | Swedish Cancer Institute                                                                               | Seattle, WA                              |                                                         |                                                                                            |
| Sabah                                    | Kadri             |                              |                  | The University of Chicago Comprehensive Cancer Center                                                  | Chicago, IL                              |                                                         |                                                                                            |



Supplemental Online Content: Nonauthor Collaborators

\*Indicates required information. Only first name, last name, and suffix will appear in PubMed.

| <b>*First Name and Middle Initial(s)</b> | <b>*Last Name</b> | <b>*Suffix (eg, Jr, III)</b> | Academic Degrees | Institution                                                                            | Location (city, state/province, country) | Role or Contribution, eg, chair, principal investigator | Group (if more than 1 Group listed in the byline) and/or Subgroup (eg, Steering Committee) |
|------------------------------------------|-------------------|------------------------------|------------------|----------------------------------------------------------------------------------------|------------------------------------------|---------------------------------------------------------|--------------------------------------------------------------------------------------------|
| Jeremy                                   | Segal             |                              |                  | The University of Chicago Comprehensive Cancer Center                                  | Chicago, IL                              |                                                         |                                                                                            |
| Wanjari                                  | Pankhuri          |                              |                  | The University of Chicago Comprehensive Cancer Center                                  | Chicago, IL                              |                                                         |                                                                                            |
| Peng                                     | Wang              |                              |                  | The University of Chicago Comprehensive Cancer Center                                  | Chicago, IL                              |                                                         |                                                                                            |
| Steinhardt                               | George            |                              |                  | The University of Chicago Comprehensive Cancer Center                                  | Chicago, IL                              |                                                         |                                                                                            |
| Moung                                    | Christine         |                              |                  | University of California-San Francisco Helen Diller Family Comprehensive Cancer Center | San Francisco, CA                        |                                                         |                                                                                            |
| Laura                                    | Van't Veer        |                              |                  | University of California-San Francisco Helen Diller Family Comprehensive Cancer Center | San Francisco, CA                        |                                                         |                                                                                            |
| Eric                                     | Talevich          |                              |                  | University of California-San Francisco Helen Diller Family Comprehensive Cancer Center | San Francisco, CA                        |                                                         |                                                                                            |
| Amanda                                   | Wren              |                              |                  | University of California-San Francisco Helen Diller Family Comprehensive Cancer Center | San Francisco, CA                        |                                                         |                                                                                            |
| Alejandro                                | Sweet-Cordero     |                              |                  | University of California-San Francisco Helen Diller Family Comprehensive Cancer Center | San Francisco, CA                        |                                                         |                                                                                            |
| Michelle                                 | Turski            |                              |                  | University of California-San Francisco Helen Diller Family Comprehensive Cancer Center | San Francisco, CA                        |                                                         |                                                                                            |
| Philippe                                 | Bedard            |                              |                  | Princess Margaret Cancer Centre                                                        | Toronto, Ontario, Canada                 |                                                         |                                                                                            |
| Suzanne                                  | KamelReid         |                              |                  | Princess Margaret Cancer Centre                                                        | Toronto, Ontario, Canada                 |                                                         |                                                                                            |

Supplemental Online Content: Nonauthor Collaborators

\*Indicates required information. Only first name, last name, and suffix will appear in PubMed.

| *First Name and Middle Initial(s) | *Last Name   | *Suffix (eg, Jr, III) | Academic Degrees | Institution                     | Location (city, state/province, country) | Role or Contribution, eg, chair, principal investigator | Group (if more than 1 Group listed in the byline) and/or Subgroup (eg, Steering Committee) |
|-----------------------------------|--------------|-----------------------|------------------|---------------------------------|------------------------------------------|---------------------------------------------------------|--------------------------------------------------------------------------------------------|
| Zhibin                            | Lu           |                       |                  | Princess Margaret Cancer Centre | Toronto, Ontario, Canada                 |                                                         |                                                                                            |
| Trevor                            | Pugh         |                       |                  | Princess Margaret Cancer Centre | Toronto, Ontario, Canada                 |                                                         |                                                                                            |
| Lillian                           | Siu          |                       |                  | Princess Margaret Cancer Centre | Toronto, Ontario, Canada                 |                                                         |                                                                                            |
| Stuart                            | Watt         |                       |                  | Princess Margaret Cancer Centre | Toronto, Ontario, Canada                 |                                                         |                                                                                            |
| Natasha                           | Leighl       |                       |                  | Princess Margaret Cancer Centre | Toronto, Ontario, Canada                 |                                                         |                                                                                            |
| Celeste                           | Yu           |                       |                  | Princess Margaret Cancer Centre | Toronto, Ontario, Canada                 |                                                         |                                                                                            |
| Lailah                            | Ahmed        |                       |                  | Princess Margaret Cancer Centre | Toronto, Ontario, Canada                 |                                                         |                                                                                            |
| Geeta                             | Krishna      |                       |                  | Princess Margaret Cancer Centre | Toronto, Ontario, Canada                 |                                                         |                                                                                            |
| Carlos                            | Virtaenen    |                       |                  | Princess Margaret Cancer Centre | Toronto, Ontario, Canada                 |                                                         |                                                                                            |
| Helen                             | Chow         |                       |                  | Princess Margaret Cancer Centre | Toronto, Ontario, Canada                 |                                                         |                                                                                            |
| Demi                              | Plagianakos  |                       |                  | Princess Margaret Cancer Centre | Toronto, Ontario, Canada                 |                                                         |                                                                                            |
| Samantha                          | Del Rossi    |                       |                  | Princess Margaret Cancer Centre | Toronto, Ontario, Canada                 |                                                         |                                                                                            |
| Nitthusha                         | Singaravelan |                       |                  | Princess Margaret Cancer Centre | Toronto, Ontario, Canada                 |                                                         |                                                                                            |
| Sevan                             | Hakgor       |                       |                  | Princess Margaret Cancer Centre | Toronto, Ontario, Canada                 |                                                         |                                                                                            |
| Nazish                            | Qazi         |                       |                  | Princess Margaret Cancer Centre | Toronto, Ontario, Canada                 |                                                         |                                                                                            |

Supplemental Online Content: Nonauthor Collaborators

\*Indicates required information. Only first name, last name, and suffix will appear in PubMed.

| <b>*First Name and Middle Initial(s)</b> | <b>*Last Name</b> | <b>*Suffix (eg, Jr, III)</b> | Academic Degrees | Institution                     | Location (city, state/province, country) | Role or Contribution, eg, chair, principal investigator | Group (if more than 1 Group listed in the byline) and/or Subgroup (eg, Steering Committee) |
|------------------------------------------|-------------------|------------------------------|------------------|---------------------------------|------------------------------------------|---------------------------------------------------------|--------------------------------------------------------------------------------------------|
| Alisha                                   | Nguyen            |                              |                  | Princess Margaret Cancer Centre | Toronto, Ontario, Canada                 |                                                         |                                                                                            |
| Natalie                                  | Stickle           |                              |                  | Princess Margaret Cancer Centre | Toronto, Ontario, Canada                 |                                                         |                                                                                            |
| Thomas                                   | Stricker          |                              |                  | Vanderbilt-Ingram Cancer Center | Nashville, TN                            |                                                         |                                                                                            |
| Christine                                | Micheel           |                              |                  | Vanderbilt-Ingram Cancer Center | Nashville, TN                            |                                                         |                                                                                            |
| Ingrid                                   | Anderson          |                              |                  | Vanderbilt-Ingram Cancer Center | Nashville, TN                            |                                                         |                                                                                            |
| Leigh                                    | Jones             |                              |                  | Vanderbilt-Ingram Cancer Center | Nashville, TN                            |                                                         |                                                                                            |
| Lucy                                     | Wang              |                              |                  | Vanderbilt-Ingram Cancer Center | Nashville, TN                            |                                                         |                                                                                            |
| Christine                                | Lovly             |                              |                  | Vanderbilt-Ingram Cancer Center | Nashville, TN                            |                                                         |                                                                                            |
| Lucy                                     | Wang              |                              |                  | Vanderbilt-Ingram Cancer Center | Nashville, TN                            |                                                         |                                                                                            |
| Michele                                  | LeNoue Newton     |                              |                  | Vanderbilt-Ingram Cancer Center | Nashville, TN                            |                                                         |                                                                                            |
| Ben                                      | Park              |                              |                  | Vanderbilt-Ingram Cancer Center | Nashville, TN                            |                                                         |                                                                                            |
| Jeremy                                   | Warner            |                              |                  | Vanderbilt-Ingram Cancer Center | Nashville, TN                            |                                                         |                                                                                            |
| Daniel                                   | Fabbri            |                              |                  | Vanderbilt-Ingram Cancer Center | Nashville, TN                            |                                                         |                                                                                            |
| Joseph                                   | Coco              |                              |                  | Vanderbilt-Ingram Cancer Center | Nashville, TN                            |                                                         |                                                                                            |
| Chen                                     | Ye                |                              |                  | Vanderbilt-Ingram Cancer Center | Nashville, TN                            |                                                         |                                                                                            |

## Supplemental Online Content: Nonauthor Collaborators

\*Indicates required information. Only first name, last name, and suffix will appear in PubMed.

| *First Name and Middle Initial(s) | *Last Name        | *Suffix (eg, Jr, III) | Academic Degrees | Institution                                                                 | Location (city, state/province, country) | Role or Contribution, eg, chair, principal investigator | Group (if more than 1 Group listed in the byline) and/or Subgroup (eg, Steering Committee) |
|-----------------------------------|-------------------|-----------------------|------------------|-----------------------------------------------------------------------------|------------------------------------------|---------------------------------------------------------|--------------------------------------------------------------------------------------------|
| Sandip                            | Chaugai           |                       |                  | Vanderbilt-Ingram Cancer Center                                             | Nashville, TN                            |                                                         |                                                                                            |
| Sanjay                            | Mishra            |                       |                  | Vanderbilt-Ingram Cancer Center                                             | Nashville, TN                            |                                                         |                                                                                            |
| Yuanchu James                     | Yang              |                       |                  | Vanderbilt-Ingram Cancer Center                                             | Nashville, TN                            |                                                         |                                                                                            |
| Li                                | Wen               |                       |                  | Vanderbilt-Ingram Cancer Center                                             | Nashville, TN                            |                                                         |                                                                                            |
| Rodrigo                           | Dienstmann        |                       |                  | Vall d' Hebron Institute of Oncology                                        | Barcelona, Spain                         |                                                         |                                                                                            |
| Susana                            | Aguilar Izquierdo |                       |                  | Vall d' Hebron Institute of Oncology                                        | Barcelona, Spain                         |                                                         |                                                                                            |
| Cristina                          | Viplana Donato    |                       |                  | Vall d' Hebron Institute of Oncology                                        | Barcelona, Spain                         |                                                         |                                                                                            |
| Francesco                         | Mancuso           |                       |                  | Vall d' Hebron Institute of Oncology                                        | Barcelona, Spain                         |                                                         |                                                                                            |
| Umit                              | Topaloglu         |                       |                  | Wake Forest University Health Sciences (Wake Forest Baptist Medical Center) | Winston-Salem, NC                        |                                                         |                                                                                            |
| Liang                             | Liu               |                       |                  | Wake Forest University Health Sciences (Wake Forest Baptist Medical Center) | Winston-Salem, NC                        |                                                         |                                                                                            |
| Meijian                           | Guan              |                       |                  | Wake Forest University Health Sciences (Wake Forest Baptist Medical Center) | Winston-Salem, NC                        |                                                         |                                                                                            |
| Wei                               | Zhang             |                       |                  | Wake Forest University Health Sciences (Wake Forest Baptist Medical Center) | Winston-Salem, NC                        |                                                         |                                                                                            |

Supplemental Online Content: Nonauthor Collaborators

\*Indicates required information. Only first name, last name, and suffix will appear in PubMed.

| <b>*First Name and Middle Initial(s)</b> | <b>*Last Name</b> | <b>*Suffix (eg, Jr, III)</b> | Academic Degrees | Institution                                                                 | Location (city, state/province, country) | Role or Contribution, eg, chair, principal investigator | Group (if more than 1 Group listed in the byline) and/or Subgroup (eg, Steering Committee) |
|------------------------------------------|-------------------|------------------------------|------------------|-----------------------------------------------------------------------------|------------------------------------------|---------------------------------------------------------|--------------------------------------------------------------------------------------------|
| Guangxu                                  | Jin               |                              |                  | Wake Forest University Health Sciences (Wake Forest Baptist Medical Center) | Winston-Salem, NC                        |                                                         |                                                                                            |
| James                                    | Knight            |                              |                  | Yale University Cancer Center                                               | New Haven, CT                            |                                                         |                                                                                            |
| Michael                                  | D'Eletto          |                              |                  | Yale University Cancer Center                                               | New Haven, CT                            |                                                         |                                                                                            |
| E. Zeynep                                | Ormay             |                              |                  | Yale University Cancer Center                                               | New Haven, CT                            |                                                         |                                                                                            |
| Shrikant                                 | Mane              |                              |                  | Yale University Cancer Center                                               | New Haven, CT                            |                                                         |                                                                                            |
| Kaya                                     | Bilguvar          |                              |                  | Yale University Cancer Center                                               | New Haven, CT                            |                                                         |                                                                                            |
| Walther                                  | Zenta             |                              |                  | Yale University Cancer Center                                               | New Haven, CT                            |                                                         |                                                                                            |
| Daniel                                   | Dykas             |                              |                  | Yale University Cancer Center                                               | New Haven, CT                            |                                                         |                                                                                            |
